# Supplementary material
Source: publisher figshare collection journal article supplement (https://acs.figshare.com/ndownloader/files/4931398)
Supplement: Supplementary file 1 [file 4931398]

# Supporting Information:

## D<sub>2</sub>O Interaction with Planar ZnO(0001) Bilayer Supported on Au(111): Structures, Energetics and Influence of Hydroxyls

*Xingyi Deng<sup>1,2,\*</sup>, Dan Sorescu<sup>1</sup>, Junseok Lee<sup>1,2</sup>*

<sup>1</sup>National Energy Technology Laboratory (NETL), United States Department of Energy, P.O. Box 10940, Pittsburgh, Pennsylvania 15236, United States, <sup>2</sup>AECOM, P.O. Box 618, South Park, Pennsylvania 15129, United States

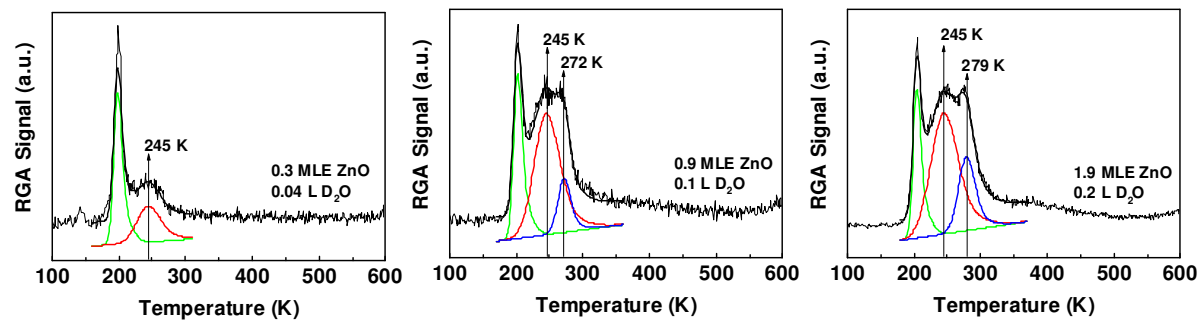

**Figure S1.** Examples of fittings of the TPD traces to semi-quantify the relative amount of  $D_2O$  that saturates desorption peaks  $\beta$  and  $\gamma$ . For simplicity, the fitting has been performed using components of mixed Gaussian-Lorentzian functions. Only the peak positions were constrained for the fitting. The intensities and the full width at half maxima of the components were optimized.

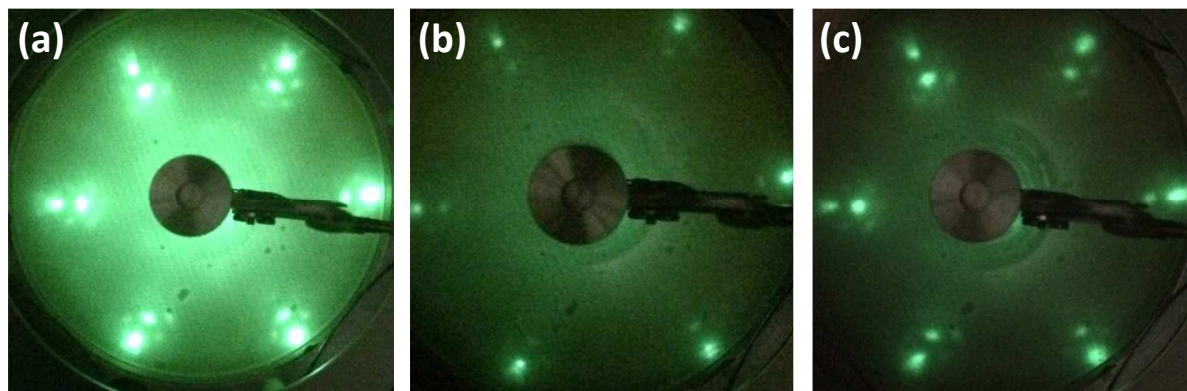

**Figure S2.** LEED patterns of (a) the clean 1.1 MLE ZnO(0001) bilayer on Au(111) showing a coincidence structure of ZnO(0001)-(7 × 7)/Au(111)-(8 × 8); (b) after an exposure of 0.3 L  $D_2O$  on 1.1 MLE ZnO at  $T = 100$  K; and (c) after heating to  $T = 600$  K. All LEED patterns were obtained at  $T = 100$  K with a beam energy of 42 eV.
